# Supplementary material
Source: MDPI journal article supplement (https://www.mdpi.com/2227-9032/8/3/293)
Supplement: s1 [file s1]

•  
•  
•  
•  
•  
•  
•

11-agosto-2020

## HEALTHCARE

Dear Editor;

I refer the manuscript entitled “**Quality and dependence degree of chronic patients in a chronicity care model**” to be considered for publication in **Healthcare**. The reason for sending your journal is to generate scientific impact among health professionals regarding the contents of the article, through reflection and critical analysis of nursing research.

Their authors, the undersigned, declare:

- Is an original work.
- Has not been previously published in other journals.
- Has not been submitted simultaneously to another publication.
- The author contributed intellectually in their development.
- The author has read and approved the final version of the manuscript submitted.
- We have exceeded 600 words of the limit, because enough analysis variables have been included in the study and the results and discussion have required more length.
- This study was approved by Research Ethics Committee of the Balearic Islands (IB3389/17PI)
- That, if published on paper, transfer all copyright to the publisher, without whose permission may not reproduce any material published on it.

Through this document, MDPI assumes exclusive rights to edit, publish, reproduce, distribute copies, prepare derivative works on paper, electronic or multimedia and include the article in national and international indexes and bibliographic databases.

Thanking you in advance for your cooperation and awaiting your prompt response;

Sincerely,



JESÚS MOLINA MULA

.....
